# Supplementary material for: The Phytophthora infestans Haustorium Is a Site for Secretion of Diverse Classes of Infection-Associated Proteins
Source: PubMed Central journal article supplement (PMC6113627; doi:10.1128/mbio.01216-18), 2018-08-28
Supplement: mbo004184040sf2.pdf [file mbo004184040sf2.pdf]

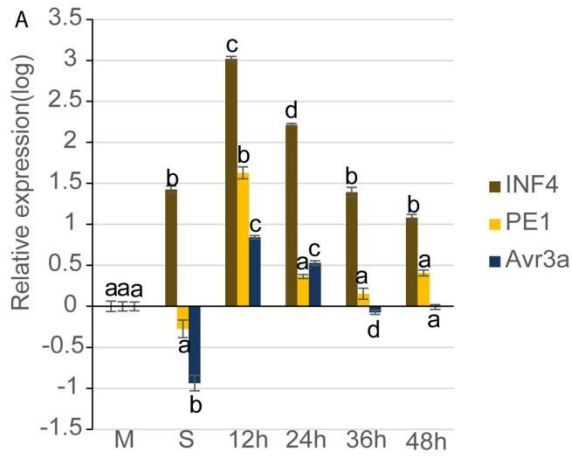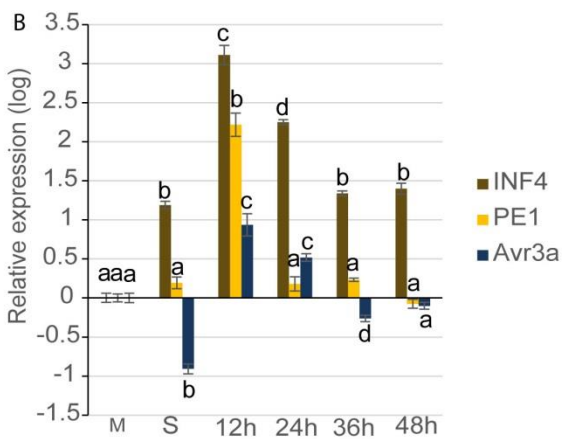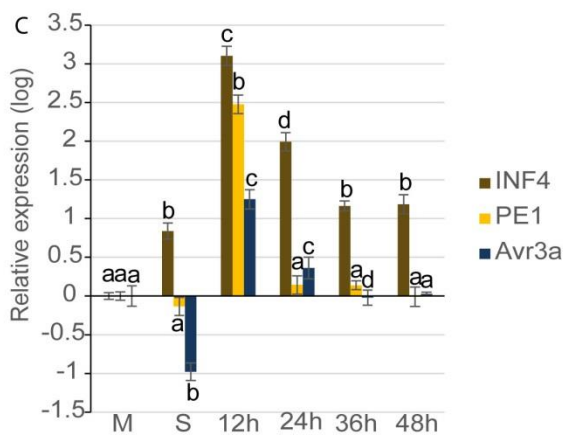

**FIG S2 INF4 and Pectinesterase (PE) are highly up-regulated during infection.**

Quantitative RT-PCR shows that the relative expression levels of INF4 (PITG\_21410) and pectinesterase (PE1, PITG\_01029), like the effector Avr3a (PITG\_14783), were dramatically up-regulated at 12h post infection (hpi) compared to *in vitro* mycelium (M) levels, which were normalized to log<sub>1</sub> (0). *INF4* remained highly up-regulated beyond 12 hpi whereas the level of expression of *PE1* decreased relative to M, but is still high relative to S=Sporangia. Error bars are standard error. A, B, C are three independent biological replications. Letters on the graph denote statistically significant differences ( $p < 0.05$  ANOVA, Student-Newman-Keuls).
