# Supplementary material for: The Phytophthora infestans Haustorium Is a Site for Secretion of Diverse Classes of Infection-Associated Proteins
Source: PubMed Central journal article supplement (PMC6113627; doi:10.1128/mbio.01216-18), 2018-08-28
Supplement: mbo004184040sf5.pdf [file mbo004184040sf5.pdf]

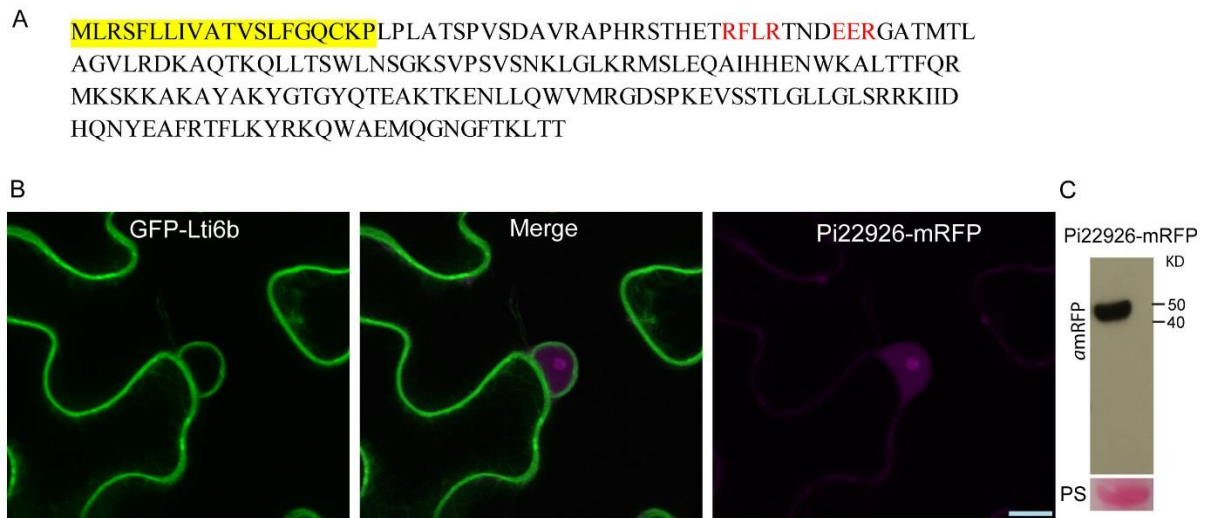

**FIG S5 *Phytophthora infestans* RXLR effector Pi22926 localises to the nucleus and accumulates in the nucleolus.** (A) The protein sequence of Pi22926. RXLR and EER motifs are indicated in red. The signal peptide is highlighted in yellow. (B) Single optical section confocal image of the Pi22926-mRFP fusion protein expressed in transgenic *N. benthamiana* in which the plasma membrane and nuclear membrane were labelled with GFP-LTi6b. The Pi22926-mRFP fusion localises to the nucleoplasm and nucleolus with faint cytoplasmic signal. Scale bar indicates 10  $\mu$ m. (C) Immunoblot of the construct used in (B), showing the stability of the fusion protein.
